# Supplementary material for: Anti-cardiolipin and other anti-phospholipid antibodies in critically ill COVID-19 positive and negative patients
Source: bioRxiv or medRxiv preprint supplement (doi:10.1101/2021.02.19.21252113), 2021-02-23
Supplement: Supplementary file [file media-2.zip]

**Supplemental Table 1: Premorbid Clinical Characteristics and Therapeutics**

|                                           | All (N) | COVID+ (N) | COVID- (N) |
|-------------------------------------------|---------|------------|------------|
|                                           | 42      | 22         | 20         |
| Respiratory PMH                           | 18      | 8          | 10         |
| Cardiovascular PMH                        | 19      | 11         | 8          |
| Renal PMH                                 | 7       | 6          | 1          |
| Type 2 Diabetes                           | 20      | 12         | 8          |
| Hypertension                              | 24      | 14         | 10         |
| Other comorbidities                       | 37      | 18         | 19         |
| Premorbid steroid used                    | 3       | 1          | 2          |
| Premorbid immunomodulatory medication use | 2       | 1          | 1          |
| Premorbid ACEi/ARB use                    | 15      | 10         | 5          |

Abbreviations: ACEi, Angiotensin-converting enzyme inhibitors; ARB, angiotensin receptor blocker; PMH, past medical history.

Legend: “Other comorbidities” include autoimmune diseases: Myasthenia gravis among COVID+, and autoimmune hemolytic anemia, rheumatoid arthritis and multiple sclerosis among the COVID-. No statistically significant difference between COVID+ and COVID- patients for all variables were detected using ANOVA for continuous variables and Fisher’s exact test for categorical variables at  $\alpha=0.05$

**Supplemental Table 2: Association between aCL IgG and high-titre anti-cytokine autoantibodies**

|                    | Cohort       | All         | aCL positive | aCL negative |
|--------------------|--------------|-------------|--------------|--------------|
|                    | N            | 42          | 20           | 22           |
| ALL                | <i>N (%)</i> | 16/42 (38%) | 13/20 (65%)  | 3/22 (14%)   |
| anti-GMCSF         | <i>N (%)</i> | 1/42 (2%)   | 1/20 (5%)    | 0/22 (0%)    |
| anti-IFN- $\gamma$ | <i>N (%)</i> | 7/42 (17%)  | 6/20 (30%)   | 1/22 (5%)    |
| anti-IL-1a         | <i>N (%)</i> | 1/42 (2%)   | 0/20 (0%)    | 1/22 (5%)    |
| anti-IL-6          | <i>N (%)</i> | 5/42 (12%)  | 3/20 (15%)   | 2/22 (9%)    |
| anti-IL-10         | <i>N (%)</i> | 5/42 (12%)  | 5/20 (25%)   | 0/22 (0%)    |
| anti-IL-12p40      | <i>N (%)</i> | 2/42 (5%)   | 2/20 (10%)   | 0/22 (0%)    |
| anti-IL-17a        | <i>N (%)</i> | 2/42 (5%)   | 2/20 (10%)   | 0/22 (0%)    |
| anti-IL-17f        | <i>N (%)</i> | 4/42 (10%)  | 4/20 (20%)   | 0/22 (0%)    |
| anti-IL-22         | <i>N (%)</i> | 1/42 (2%)   | 0/22 (0%)    | 1/22 (5%)    |

Abbreviations: aCL, anticardiolipin; GMCSF, granulocyte-macrophage colony-stimulating factor; IFN, interferon; IL, interleukin.

Legend: The table reports the number of patients with high titres of anti-cytokine antibodies at any time during the first 10 days of ICU admission. “ALL” represents all patient having a high titre of anti-cytokine antibody of any type during that period. The numbers of the specific anti-cytokine antibodies sum to more than “ALL” since some patients had more than one high titre anti-cytokine antibody. Once adjusted for multiple comparisons, there were no statistically significant differences between aCL positive and aC negative- for any of the results (Fisher’s exact test at  $\alpha=0.05$  followed by the false discovery rate at  $q=0.05$ ). The following anti-cytokine AAB did not show high levels in any of the patients: anti-BAFF, anti-IFN- $\beta$ , anti-TNF- $\alpha$ , anti-IL8, anti-IL-15 and anti-IL-18.

**Supplemental Table 3: Association between aCL IgG and anti-cytokine autoantibodies per COVID-19 status**

|                    |          |              | Anti-cytokine autoantibody titers |               |
|--------------------|----------|--------------|-----------------------------------|---------------|
|                    |          |              | Positive                          | High-positive |
| COVID <sup>+</sup> | aCL IgG  | <i>N</i> , % | 12/13, 92%*                       | 9/13, 69%     |
| COVID <sup>-</sup> | positive |              | 4/7, 57%                          | 4/7, 57%      |

Abbreviations: aCL, anti-cardiolipin antibodies.

Legend: The asterisk (\*) represents a significant association between aCL IgG and anti-cytokine autoantibodies (Fisher's exact test,  $p=0.006$ , adjusted for multiple comparisons).
